# Supplementary material for: Monocyte NOTCH2 expression predicts IFN-β immunogenicity in multiple sclerosis patients
Source: JCI journal article supplement (doi:10.1172/jci.insight.99274), 2018-06-06
Supplement: sd1 [file 1]

## Supplemental Data

### Monocyte Notch2 expression predicts interferon-beta immunogenicity in multiple sclerosis patients

Marsilio Adriani<sup>1</sup>, Petra Nytrova<sup>2</sup>, Cyprien Mbogning<sup>3</sup>, Signe Hässler<sup>3</sup>, Karel Medek<sup>2</sup>, Poul Erik H Jensen<sup>4</sup>, Paul Creeke<sup>5</sup>, Clemens Warnke<sup>6,7</sup>, Kathleen Wolfram<sup>6</sup>, Bernhard Hemmer<sup>8</sup>, Claudia Sievers<sup>9</sup>, Raija L.P. Lindberg Gasser<sup>9</sup>, Nicolas Fissolo<sup>10</sup>, Florian Diesenhammer<sup>11</sup>, Zsolt Bocskei<sup>12</sup>, Vincent Mikol<sup>12</sup>, Anna Fogdell-Hahn<sup>13</sup>, Eva Havrdova<sup>2</sup>, Philippe Broët<sup>3,14</sup>, Pierre Dönnès<sup>15</sup>, Claudia Mauri<sup>1\*</sup>, and Elizabeth C Jury<sup>1\*</sup>

#### Affiliations:

<sup>1</sup>Department of Rheumatology, University College Hospital, UK.

<sup>2</sup>Department of Neurology and Center for Clinical Neuroscience, First Faculty of Medicine, Charles University and General University Hospital in Prague, Czech Republic.

<sup>3</sup>CESP, Fac. De Médecine-Univ. Paris-Sud, Fac. De Médecine-UVSQ, INSERM, Université Paris-Saclay, 94805, Villejuif, France

<sup>4</sup>Neuroimmunology Laboratory, DMSC, Department of Neurology, Rigshospitalet, Region H, Copenhagen, Denmark

<sup>5</sup>Neuroimmunology Unit, Centre for Neuroscience and Trauma, Blizard Institute, Queen Mary University of London, London, UK.

<sup>6</sup>Department of Neurology, Medical Faculty, Research Group for Clinical and Experimental Neuroimmunology, Heinrich-Heine-University, Düsseldorf, Germany.

<sup>7</sup>University Hospital Koeln, Dept. of Neurology, Koeln, Germany

<sup>8</sup>Klinikum rechts der Isar, Department of Neurology, School of Medicine, Technical University of Munich, Munich, Germany;

<sup>9</sup>Laboratory of Clinical Neuroimmunology, Departments of Biomedicine and Clinical Research, University Hospital Basel and University of Basel, Basel, Switzerland

<sup>10</sup>Centre d'Esclerosi Múltiple de Catalunya (Cemcat), Hospital Universitari Vall d'Hebron, Barcelona, Spain

<sup>11</sup>Clinical Department of Neurology, Innsbruck Medical University, Innsbruck, Austria.

<sup>12</sup>Translational Sciences Unit, Sanofi R&D, 91385 Chilly-Mazarin, Paris, France

<sup>13</sup>Karolinska Institutet, Department of Clinical Neuroscience, Center for Molecular Medicine (CMM), Karolinska University Hospital, Sweden.

<sup>14</sup>Assistance Publique - Hôpitaux de Paris, Hôpital Paul Brousse, Villejuif, France

<sup>15</sup>Scicross AB, Skövde, Sweden

## **Supplemental Acknowledgments for ABIRISK Consortium**

### **List of ABIRISK partners, leaders and task responsible persons:**

INSERM (Marc Pallardy, Sophie Tourdot, Xavier Mariette, Sebastien Lacroix-Desmazes, Philippe Broet, Delphine Bachelet, Nadia El-Hamdi); GlaxoSmithKline (Dan Sikkema, Amy Loercher, Julie Davidson, Andy Lawton, Steve Etheridge, Sally Miles); Medizinische Universität Innsbruck (Florian Deisenhammer); UCB Pharma SA (Louis Christodoulou, Hishani Kirby); Academisch Medisch Centrum bij de Universiteit van Amsterdam (Niek De Vries, Anne Musters); Assistance Publique Hôpitaux de Paris (Aline Doublet, Mohcine Benbija); Groupe d'études thérapeutiques des affections inflammatoires du tube digestif (Matthieu Allez, Sabrina Williams); Universitätsklinikum Bonn (Johannes Oldenburg, Thilo Albert); Heinrich-Heine-University, Düsseldorf (Hans-Peter Hartung, Clemens Warnke, Kathleen Wolfram, Bernd Kieseier); Karolinska Institutet (Anna Fogdell Hahn, Malin Ryner, Ryan Ramanujam); Pfizer (Tim Hickling, Bonnie Rupp); Merck Serono (Elisa Bertotti); Ipsen (Julie Le Grand); University College London (Claudia Mauri, Elizabeth Jury, Jessica Manson, David Isenberg); Sanofi-Aventis Research and Development (Vincent Mikol, Agnès Hincelin-Mery, Catherine Prades, Pauline Loas); Università di Firenze (Enrico Maggi); Novartis Pharma AG (Annette Karle, Sebastian Spindeldreher, Verena Romach-Riegraf); Fondazione per l'Istituto di Ricerca in Biomedicina (Antonio Lanzavecchia); Klinikum rechts der Isar der Technischen Universität München (Bernhard Hemmer); Commissariat à l'Energie Atomique (Bernard Maillere); Novo Nordisk (Christian Ross Pedersen); Scicross AB (Pierre Dönnès); Bayer Schering Pharma AG (Jeannette Lo, Pascale Buchmann); eTRIKS (Fabien Richard); Paul-Ehrlich-Institut (Christine Keipert); ALTA Ricerca e Sviluppo in Biotecnologie S.r.l.u. (Riccardo Bertini, Simona Farnetani); Charles University in Prague (Eva Havrdová, Petra Nytrva); Queen Mary University of London (Gavin Giovannoni).

## Supplemental Tables

**Supplemental Table 1:** Markers retained for analysis in the different subsets

| CD4 <sup>+</sup> T cells |        | Monocytes             |         | B cells               |           |
|--------------------------|--------|-----------------------|---------|-----------------------|-----------|
| beta2 microglobulin      | CD41   | beta2 microglobulin   | CD45    | beta2 microglobulin   | CD49c     |
| BTLA                     | CD43   | C3AR                  | CD45RA  | BTLA                  | CD49d     |
| C3AR                     | CD44   | C5L2                  | CD45RB  | CCR10                 | CD49e     |
| CCR10                    | CD45   | CCR10                 | CD45RO  | CD10                  | CD49f     |
| CD100                    | CD45RA | CD10                  | CD46    | CD100                 | CD5       |
| CD101 (BB27)             | CD45RB | CD100                 | CD47    | CD102                 | CD50      |
| CD102                    | CD45RO | CD101 (BB27)          | CD48    | CD105                 | CD51      |
| CD107a                   | CD46   | CD102                 | CD49a   | CD107a                | CD51-61   |
| CD119 (IFNgR a chain)    | CD47   | CD103                 | CD49d   | CD108                 | CD52      |
| CD11a                    | CD48   | CD105                 | CD49e   | CD112 (Nectin-2)      | CD53      |
| CD11b                    | CD49a  | CD107a                | CD49f   | CD116                 | CD54      |
| CD126 (IL-6Ra)           | CD49c  | CD109                 | CD50    | CD119 (IFNgR a chain) | CD55      |
| CD127 (IL-7Ra)           | CD49d  | CD112 (Nectin-2)      | CD51    | CD11a                 | CD58      |
| CD132                    | CD49e  | CD114                 | CD51-61 | CD11b                 | CD59      |
| CD134                    | CD49f  | CD115                 | CD52    | CD11c                 | CD6       |
| CD143                    | CD5    | CD116                 | CD53    | CD123                 | CD61      |
| CD148                    | CD50   | CD119 (IFNgR a chain) | CD54    | CD124                 | CD62E     |
| CD150 (SLAM)             | CD51   | CD11a                 | CD55    | CD126 (IL-6Ra)        | CD62L     |
| CD154                    | CD52   | CD11b                 | CD56    | CD129 (IL-9R)         | CD62P     |
| CD156c (ADAM10)          | CD53   | CD11b (activated)     | CD57    | CD131                 | CD63      |
| CD16                     | CD54   | CD11c                 | CD58    | CD132                 | CD66a-c-e |
| CD161                    | CD55   | CD123                 | CD59    | CD137L (4-1BBL)       | CD69      |
| CD162                    | CD57   | CD126 (IL-6Ra)        | CD6     | CD144                 | CD7       |
| CD164                    | CD58   | CD129 (IL-            | CD61    | CD146                 | CD70      |

|         |                   |                     |           |                    |                          |
|---------|-------------------|---------------------|-----------|--------------------|--------------------------|
|         |                   | 9R)                 |           |                    |                          |
| CD165   | CD59              | CD13                | CD62E     | CD148              | CD71                     |
| CD166   | CD6               | CD131               | CD62L     | CD150<br>(SLAM)    | CD73                     |
| CD172g  | CD61              | CD132               | CD62P     | CD156c<br>(ADAM10) | CD74                     |
| CD18    | CD62L             | CD137L (4-<br>1BBL) | CD63      | CD158e             | CD79b                    |
| CD183   | CD63              | CD138               | CD64      | CD16               | CD80                     |
| CD184   | CD69              | CD140b              | CD66a-c-e | CD162              | CD81                     |
| CD195   | CD7               | CD141               | CD69      | CD164              | CD82                     |
| CD196   | CD71              | CD144               | CD7       | CD165              | CD83                     |
| CD197   | CD73              | CD146               | CD71      | CD166              | CD84                     |
| CD2     | CD81              | CD148               | CD73      | CD167a             | CD85j                    |
| CD200   | CD82              | CD15                | CD74      | CD170              | CD86                     |
| CD200R  | CD84              | CD155<br>(PVR)      | CD79b     | CD172a             | CD87                     |
| CD205   | CD85a             | CD156c<br>(ADAM10)  | CD80      | CD172b             | CD89                     |
| CD21    | CD88              | CD158d              | CD81      | CD18               | CD8a                     |
| CD210   | CD8a              | CD16                | CD82      | CD180              | CD9                      |
| CD218a  | CD9               | CD162               | CD83      | CD183              | CD95                     |
| CD229   | CD95              | CD163               | CD84      | CD184              | CD96                     |
| CD231   | CD96              | CD164               | CD85a     | CD193              | CD97                     |
| CD235ab | CD97              | CD165               | CD85d     | CD195              | CD99                     |
| CD243   | CD99              | CD166               | CD85h     | CD196              | CX3CR1                   |
| CD244   | CLEC12A           | CD167a              | CD85j     | CD197              | CXCR7                    |
| CD245   | CX3CR1            | CD169               | CD85k     | CD1c               | DLL4                     |
| CD25    | HLA-A,B,C         | CD170               | CD86      | CD1d               | DR3                      |
| CD257   | HLA-A2            | CD172a              | CD87      | CD2                | FcRL6                    |
| CD26    | HLA-E             | CD172b              | CD88      | CD20               | HLA-A,B,C                |
| CD27    | Integrin<br>beta7 | CD179a              | CD89      | CD200              | HLA-A2                   |
| CD270   | MSC<br>(W4A5)     | CD18                | CD8a      | CD200R             | HLA-E                    |
| CD274   | Notch 2           | CD180               | CD9       | CD202b             | Ig light<br>chain k      |
| CD277   | TCR a-b           | CD181               | CD93      | CD205              | Ig light<br>chain lambda |
| CD278   | TCR V<br>beta8    | CD182               | CD94      | CD21               | IgD                      |
| CD279   | TCR V<br>beta9    | CD183               | CD95      | CD210              | IgM                      |
| CD28    |                   | CD184               | CD96      | CD213a2            | Integrin<br>beta7        |
| CD29    |                   | CD195               | CD97      | CD218a             | MSC<br>(W4A5)            |

|       |  |         |                                |         |           |
|-------|--|---------|--------------------------------|---------|-----------|
| CD298 |  | CD196   | CD99                           | CD22    | Notch 1   |
| CD3   |  | CD1c    | CLEC12A                        | CD221   | Notch 2   |
| CD303 |  | CD1d    | CLEC9A                         | CD229   | Siglec-10 |
| CD304 |  | CD2     | CX3CR1                         | CD23    | SSEA-1    |
| CD31  |  | CD20    | CXCR7                          | CD231   | SSEA-4    |
| CD317 |  | CD200R  | erbB3                          | CD235ab | TLT-2     |
| CD319 |  | CD205   | FcεRIα                         | CD243   |           |
| CD324 |  | CD21    | FcRL6                          | CD245   |           |
| CD35  |  | CD210   | Galectin-9                     | CD25    |           |
| CD352 |  | CD215   | GARP                           | CD253   |           |
| CD36  |  | CD220   | HLA-A,B,C                      | CD255   |           |
| CD360 |  | CD226   | HLA-A2                         | CD257   |           |
| CD39  |  | CD229   | HLA-E                          | CD261   |           |
|       |  | CD23    | HLA-G                          | CD262   |           |
|       |  | CD235ab | IFNγ R b chain                 | CD267   |           |
|       |  | CD244   | Ig light chain k               | CD268   |           |
|       |  | CD245   | Ig light chain lambda          | CD27    |           |
|       |  | CD252   | IgM                            | CD270   |           |
|       |  | CD254   | Integrin α9β1                  | CD274   |           |
|       |  | CD257   | Integrin β7                    | CD275   |           |
|       |  | CD258   | LAP                            | CD277   |           |
|       |  | CD261   | Lymphotoxin b receptor (LT-bR) | CD28    |           |
|       |  | CD262   | Mac-2 (galectin-3)             | CD284   |           |
|       |  | CD268   | MAIR-II                        | CD29    |           |
|       |  | CD270   | MSC (W4A5)                     | CD290   |           |
|       |  | CD274   | Notch 1                        | CD298   |           |
|       |  | CD275   | Notch 2                        | CD3     |           |
|       |  | CD277   | NPC (57D2)                     | CD301   |           |
|       |  | CD28    | Siglec-10                      | CD307   |           |
|       |  | CD282   | Siglec-9                       | CD31    |           |
|       |  | CD284   | SSEA-1                         | CD317   |           |
|       |  | CD286   | Tim-3                          | CD319   |           |
|       |  | CD29    | TLT-2                          | CD32    |           |
|       |  | CD298   | TRA-1-60-R                     | CD344   |           |
|       |  | CD3     |                                | CD35    |           |
|       |  | CD30    |                                | CD352   |           |
|       |  | CD300e  |                                | CD36    |           |

|  |  |        |  |        |  |
|--|--|--------|--|--------|--|
|  |  | CD300f |  | CD360  |  |
|  |  | CD301  |  | CD39   |  |
|  |  | CD31   |  | CD40   |  |
|  |  | CD317  |  | CD41   |  |
|  |  | CD319  |  | CD42b  |  |
|  |  | CD32   |  | CD43   |  |
|  |  | CD324  |  | CD44   |  |
|  |  | CD325  |  | CD45   |  |
|  |  | CD328  |  | CD45RA |  |
|  |  | CD33   |  | CD45RB |  |
|  |  | CD338  |  | CD46   |  |
|  |  | CD34   |  | CD47   |  |
|  |  | CD344  |  | CD48   |  |
|  |  | CD35   |  |        |  |
|  |  | CD352  |  |        |  |
|  |  | CD354  |  |        |  |
|  |  | CD355  |  |        |  |
|  |  | CD357  |  |        |  |
|  |  | CD36   |  |        |  |
|  |  | CD360  |  |        |  |
|  |  | CD39   |  |        |  |
|  |  | CD40   |  |        |  |
|  |  | CD41   |  |        |  |
|  |  | CD42b  |  |        |  |
|  |  | CD43   |  |        |  |
|  |  | CD44   |  |        |  |

**Supplemental Table 1: Legendscreen optimisation. Immune cell surface markers used to identify differentially expressed markers (DEMs) in multiple sclerosis (MS) patients with and without anti-drug antibodies to IFN- $\beta$ .** Peripheral blood mononuclear cells (PBMCs) from healthy controls (HCs) (n=10), and patients with MS (treated for 12 months, MS-T, n=28 and treatment naïve, MS-N, n=15) were analysed using the LegendScreen platform. The expression of the 332 cell surface markers in all groups were compared as described in Supplemental Figure 1. All cell surface markers that were negative in all HCs and MS patients (treated or not treated with IFN $\beta$ ) were excluded from future analysis. This Table lists all the markers on monocytes, B-cells and T-cells that were included in future analysis.



**Supplemental Table 2:**

| Cell subset                                        | Markers       | P value       |
|----------------------------------------------------|---------------|---------------|
| <b>CD14<sup>+</sup> Monocytes<br/>(% positive)</b> | CD34          | 0.0357533     |
|                                                    | FcRL6         | 0.0182166     |
|                                                    | Notch 2       | 0.000387312   |
|                                                    | CD138         | 0.0400212     |
|                                                    | CD319         | 0.00225787    |
|                                                    | CD200R        | 0.0327181     |
|                                                    | CD284         | 0.0297907     |
|                                                    | CD274         | 0.00389132    |
|                                                    | CD129 (IL-9R) | 0.0233099     |
|                                                    | CD16          | 0.0287405     |
|                                                    | CD169         | 0.0110785     |
|                                                    | CD123         | 0.012337      |
|                                                    | CD71          | 0.00318563    |
|                                                    | Tim-3         | 0.0262036     |
|                                                    | CD245         | 0.0166616     |
| <b>CD14<sup>+</sup> Monocytes<br/>(MFI)</b>        | CD262         | 6.162782e-005 |
|                                                    | HLA.E         | 0.00171913    |
|                                                    | Notch2        | 0.00216778    |
|                                                    | CD317         | 0.00238299    |
|                                                    | CX3CR1        | 0.00746864    |
|                                                    | CD81          | 0.00824417    |
|                                                    | CD82          | 0.0102909     |
|                                                    | CD254         | 0.0105262     |
|                                                    | CLEC9A        | 0.0108831     |
| <b>CD19<sup>+</sup> B-cells<br/>(MFI)</b>          | CD165         | 0.00324693    |
|                                                    | CD183         | 0.00345526    |
|                                                    | MSC_NPC       | 0.00450016    |

**Supplemental Table 2: List of differentially expressed markers (DEMs) identified between neutralizing anti-drug antibody (nADA)<sup>-</sup> and nADA<sup>+</sup> multiple sclerosis (MS)**



**patients:** Peripheral blood mononuclear cells (PBMCs) from the discovery cohort (Table 1) of MS patients treated with IFN- $\beta$  for at least 12 months who had (nADA<sup>+</sup>, n=16) or had not (nADA<sup>-</sup>, n=12) developed neutralizing anti-drug antibodies (nADA) were analysed by Legendscreen and the results compared using unpaired t-tests and a false discovery rate (FDR) <0.2 (see Figure 2A). The majority of DEMs were on monocytes (n=21), with 3 B-cell markers and no CD4<sup>+</sup>T-cell markers identified. MFI; mean fluorescence intensity.

**Supplemental Table 3:** DEMs correlation with change in brain lesion size in the previous 12 months assessed by QMRI T1 and T2 scanning

| Cell subset                                            | Markers          | T1 lesions |               | T2 lesions |               |
|--------------------------------------------------------|------------------|------------|---------------|------------|---------------|
|                                                        |                  | r          | p             | r          | p             |
| <b>CD14<sup>+</sup><br/>Monocytes<br/>(% positive)</b> | CD34             | 0.1204     | 0.6236        | -0.3788    | 0.1098        |
|                                                        | FcRL6            | -0.06549   | 0.7900        | -0.1789    | 0.4638        |
|                                                        | Notch 2          | -0.3940    | 0.0951        | -0.4011    | 0.0888        |
|                                                        | <b>CD138</b>     | -0.2105    | 0.3870        | -0.6825    | <b>0.0013</b> |
|                                                        | CD319            | -0.1649    | 0.4999        | -0.1088    | 0.6576        |
|                                                        | CD200R           | 0.04035    | 0.8697        | 0.1737     | 0.4770        |
|                                                        | CD284            | -0.1649    | 0.4999        | -0.3263    | 0.1727        |
|                                                        | CD274            | -0.1333    | 0.5863        | -0.2193    | 0.3670        |
|                                                        | CD129<br>(IL-9R) | -0.2912    | 0.2264        | -0.06491   | 0.7918        |
|                                                        | CD16             | 0.06667    | 0.7863        | 0.007018   | 0.9773        |
|                                                        | CD169            | 0.01492    | 0.9517        | 0.2756     | 0.2535        |
|                                                        | CD123            | 0.1847     | 0.4631        | -0.05470   | 0.8293        |
|                                                        | CD71             | -0.2807    | 0.2444        | -0.1035    | 0.6733        |
|                                                        | <b>Tim-3</b>     | -0.1455    | 0.5645        | -0.5191    | <b>0.0273</b> |
|                                                        | CD245            | 0.04912    | 0.8417        | -0.2982    | 0.2149        |
| <b>CD14<sup>+</sup><br/>Monocytes<br/>(MFI)</b>        | CD262            | 0.4228     | 0.0713        | 0.1579     | 0.5185        |
|                                                        | HLA.E            | 0.1421     | 0.5617        | -0.00702   | 0.9773        |
|                                                        | Notch2           | -0.3509    | 0.1408        | -0.1807    | 0.4591        |
|                                                        | CD317            | 0.06667    | 0.7863        | -0.09649   | 0.6943        |
|                                                        | CX3CR1           | 0.2333     | 0.3364        | -0.06316   | 0.7973        |
|                                                        | CD81             | 0.2667     | 0.2698        | 0.07018    | 0.7753        |
|                                                        | CD82             | 0.3860     | 0.1027        | -0.2404    | 0.3216        |
|                                                        | <b>CD254</b>     | 0.4368     | 0.0615        | 0.5140     | <b>0.0244</b> |
|                                                        | <b>CLEC9A</b>    | 0.2386     | 0.3253        | 0.5684     | <b>0.0111</b> |
| <b>CD19<sup>+</sup><br/>B-cells<br/>(MFI)</b>          | CD165            | 0.1912     | 0.4329        | 0.1737     | 0.4770        |
|                                                        | CD183            | 0.2035     | 0.4034        | 0.0        | > 0.9999      |
|                                                        | <b>MSC_NPC</b>   | 0.5474     | <b>0.0153</b> | -0.02807   | 0.9092        |

**Supplemental Table 3: Differentially expressed markers (DEMs) correlation with disease activity.** DEMs identified in Figure 2A and Supplemental Table 2 were correlated with changes in brain lesion inflammation detected by QMRI T1 and T2 scanning. Brain lesions at the time of peripheral blood mononuclear cell (PBMC) isolation were compared to MRI scans performed 12 months previously. Markers found to be associated with disease activity are highlighted in bold and the correlation shown in Figure 2A.

**Supplemental Table 4: Differentially expressed markers (DEMs)****associated with neutralizing anti-drug antibodies (nADA)-Discovery**

cohort

| Cell subsets                                             | Markers | P value       |
|----------------------------------------------------------|---------|---------------|
| <b>CD14<sup>+</sup> Monocytes</b><br><b>(% positive)</b> | Notch 2 | 0.000387312   |
|                                                          | CD200R  | 0.0327181     |
|                                                          | CD284   | 0.0297907     |
|                                                          | CD169   | 0.0110785     |
|                                                          | CD245   | 0.0166616     |
| <b>CD14<sup>+</sup> Monocytes</b><br><b>(MFI)</b>        | CD262   | 6.162782e-005 |
|                                                          | Notch2  | 0.00216778    |
|                                                          | CD317   | 0.00238299    |

**Supplemental Table 4: Differentially expressed markers (DEMs) associated with**

**neutralizing anti-drug antibodies (nADA)- Discovery cohort.** Seven markers expressed on monocytes were associated exclusively with the development of nADA in multiple sclerosis (MS) patients treated for at least 12 month with IFN- $\beta$  after excluding those markers whose expression was influenced by disease progression and IFN- $\beta$  drug itself (see also figure 2B-F and fig, S2A-C). Analysed by unpaired T-tests and a false discovery rate (FDR) <0.2.

**Supplemental Table 5: “Gold Standard” markers used for the generation of mixture model**

| CD4+ Th cells |          | Monocytes |               | CD19+ BCells |               |
|---------------|----------|-----------|---------------|--------------|---------------|
| Positive      | Negative | Positive  | Negative      | Positive     | Negative      |
| TCR a/b       | CD19     | CD11a     | TCR Vb13.     | CD20         | TCR g/d       |
| CD3           | CD22     | CD11b     | TCR Vb13.2    | CD21         | TCR Vb13.     |
| CD2           | CD23     | CD11c     | TCR Vb13.2    | CD22         | TCR Vb13.2    |
| CD28          | CD13     | CD13      | TCR Vb13.2    | BTLA         | TCR Vb13.2    |
| CD5           | CD14     | CD15      | TCR Vb23      | CD11a        | TCR Vb13.2    |
| CD6           | CD14     | CD18      | TCR Vb8       | CD18         | TCR Vb23      |
| CD7           | CD15     | CD31      | TCR Vb9       | CD48         | TCR Vb8       |
| CD27          | CD33     | CD32      | TCR Vg9       | CD32         | TCR Vb9       |
| CD44          | CD66b    | CD33      | TCR Va24-Ja18 | CD40         | TCR Vg9       |
| CD45          | CD138    | CD35      | TCR Va7.2     | CD180        | TCR Va24-Ja18 |
| CD45RO        |          | CD36      | CD90          | CD27         | TCR Va7.2     |
| CD45RA        |          | CLEC12a   | CD22          | CD23         | CD90          |
| CD127         |          | CD298     |               | CD24         |               |

**Supplemental Table 6: Discovery and validation patients nADA titres**

| Cohort    | nADA <sup>+</sup><br>Patients | ADA<br>Titre | Cohort     | nADA <sup>+</sup><br>Patients | ADA<br>Titre |
|-----------|-------------------------------|--------------|------------|-------------------------------|--------------|
| Discovery | Pt1                           | 320          | Validation | Pt1                           | 20480        |
|           | Pt2                           | 10240        |            | Pt2                           | 160          |
|           | Pt3                           | 640          |            | Pt3                           | 640          |
|           | Pt3                           | 80           |            | Pt4                           | 5120         |
|           | Pt4                           | 20480        |            | Pt5                           | 1280         |
|           | Pt5                           | 1280         |            | Pt6                           | 2560         |
|           | Pt6                           | 20480        |            | Pt7                           | 640          |
|           | Pt7                           | 320          |            | Pt8                           | 1280         |
|           | Pt8                           | 160          |            | Pt9                           | 1280         |
|           | Pt9                           | 160          |            | Pt10                          | 10240        |
|           | Pt10                          | 160          |            | Pt11                          | 40           |
|           | Pt11                          | 160          |            | Pt12                          | 1280         |
|           | Pt12                          | 80           |            | Pt13                          | 1280         |
|           | Pt13                          | 1280         |            |                               |              |
|           | Pt14                          | 320          |            |                               |              |
|           | Pt15                          | 640          |            |                               |              |
|           | Pt16                          | 320          |            |                               |              |

**Supplemental Table 6: Neutralizing anti-drug antibody (nADA) titres of discovery and validation cohort nADA<sup>+</sup> patients.** Serum samples collected 12 months after the first IFN- $\beta$  administration were tested for nADA using a luciferase-based bioassay (LUC) (1). nADA titres were determined in all positive samples. Immuno-depletion was performed for all samples screened positive to assess assay specificity.

## Supplemental Figures

Supplemental Figure 1

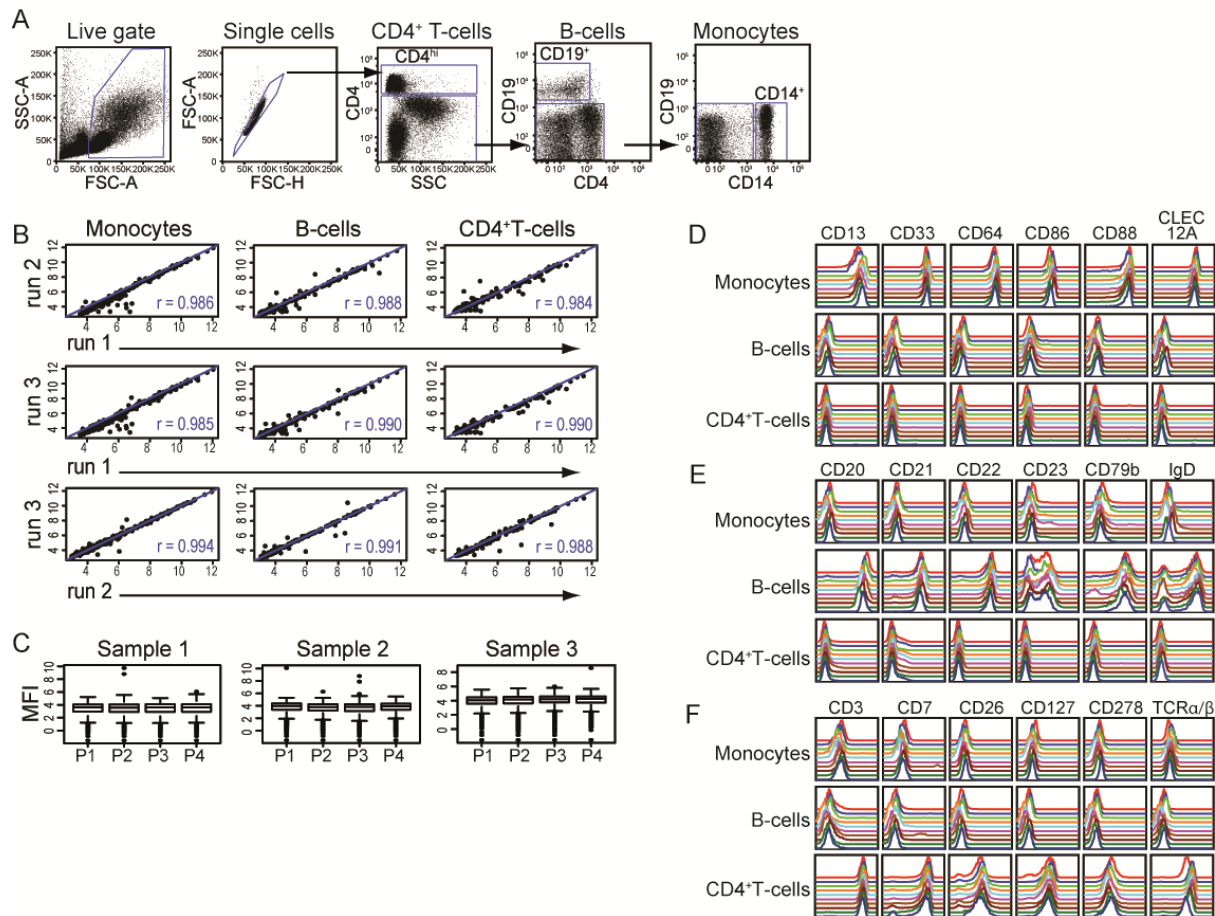

**Figure 1: Validation of high-throughput flow cytometry methodology to detect immune signatures in healthy donor lymphocytes and monocytes.**

(A) PBMC gating strategy identifying CD4<sup>+</sup> T-cells, B-cells and monocytes analysed by the LegendScreen™ platform (see Figure 1A).

Analysis of inter and intra-assay stability: (B) 10x10<sup>7</sup> PBMCs from one healthy donor (HC) were isolated and frozen in liquid nitrogen. 30x10<sup>6</sup> PBMCs were thawed on three separate days and analysed using LegendScreen. Expression levels of the 332 markers were assessed on each cell population on Day 1, Day 2 and Day 3 (runs 1-3) and the results were correlated using Spearman's correlation coefficients (r). (C) Intra-assay stability was measured by assessing mean fluorescence emissions from each of the 4 plates of the platform (P1-P4). Box plots, Mean ±SD, One-way ANOVA. (D-F) The specificity of the antibodies used for monocytes (D), CD19<sup>+</sup> B-cells (E) and CD4<sup>+</sup> T-cells (F) were validated using a panel of markers widely reported to be specific for each cell population.

Supplemental Figure 2

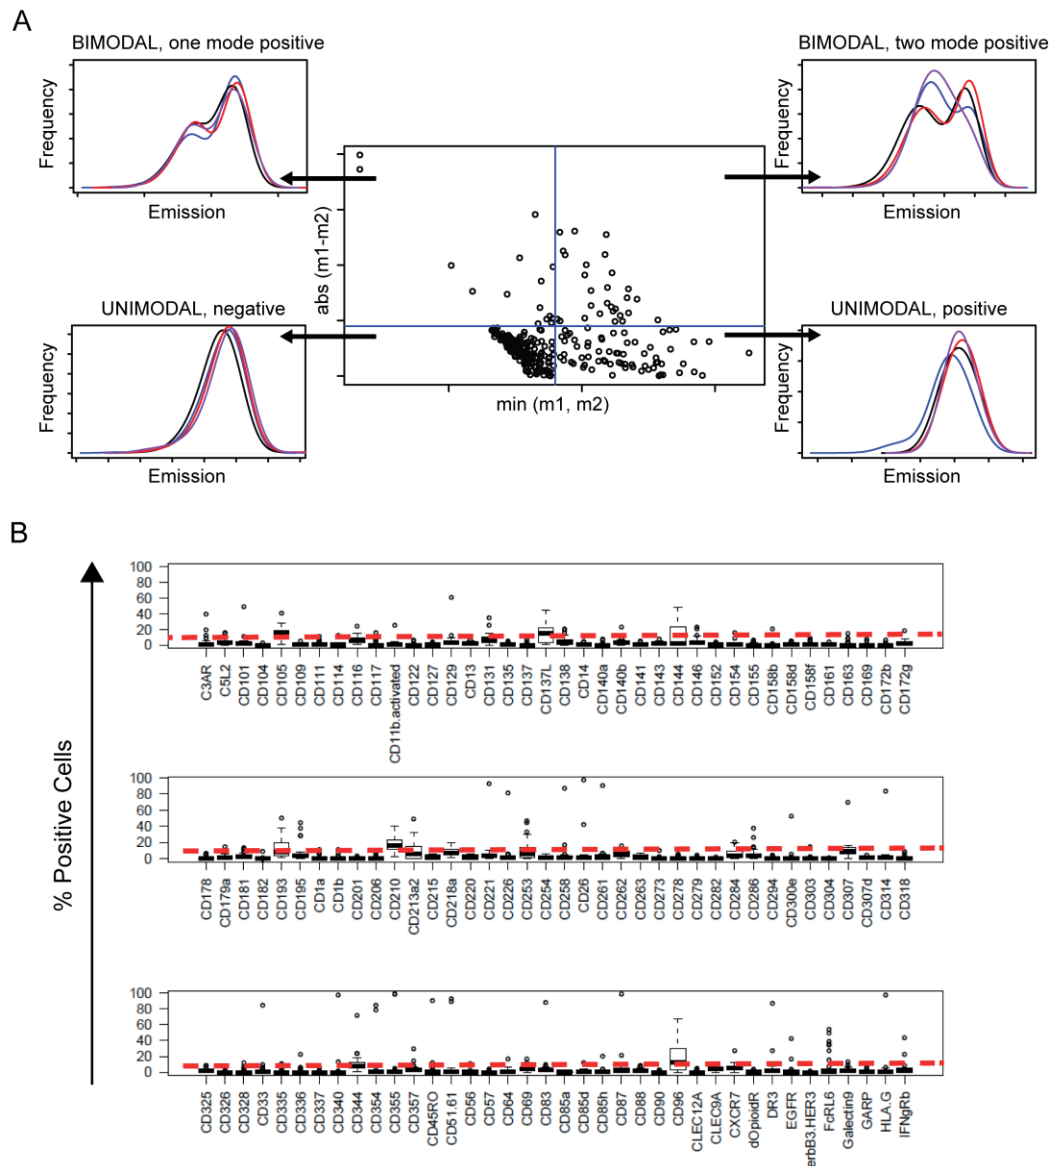

**Supplemental Figure 2: Statistical analysis strategy to improve the power of the cell surface marker analyses.**

(A) Since many markers were negative in all samples tested (Figure 1C) to increase the statistical power of the analysis a mixture model with two components was fitted on to each of the 332 markers analyzed followed by 4 class clustering for each cell subpopulation. (B) Markers that clustered with known negative gold standard markers and were expressed by less than 5% of each cell subsets in at least 90% of the samples (Total sample number=55) were removed from the analysis. Refer to materials and Methods and supplemental table 5 for a comprehensive explanation.



Supplemental Figure 3

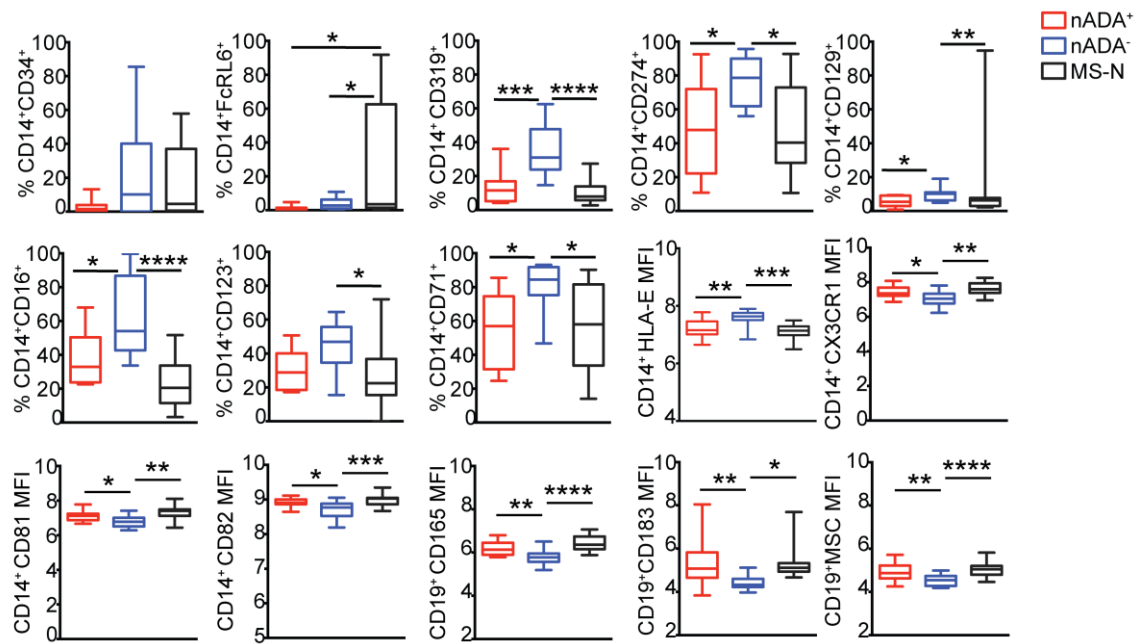

**Supplemental Figure 3. Differentially expressed markers (DEMs) associated with responses to IFN-β were excluded from further analysis.**

Markers excluded from further analysis because their expression was affected by IFN-β. Expression of DEMs identified in Figure 2A and Supplemental Table 2 were compared in nADA<sup>+</sup> (n=11), nADA<sup>-</sup> (n=9) and MS naïve (MS-N; n=15) patients using the scheme shown in Figure 2E. DEMs found to be associated with IFN-β activity were excluded from further analysis (CD34, CDFcRL6, CD319, CD274, CD129, CD16, CD123, CD71 HLA-E on monocytes and CD165, CD183 and MSC on B-cells). ANOVA with Turkey's multiple comparison test. The box plot shows the median and 25th and 75th percentiles, and the whiskers represent minimum and maximum values. \*P<0.05, \*\*P<0.01, \*\*\*P<0.001, \*\*\*\*P<0.0001.

Supplemental Figure 4

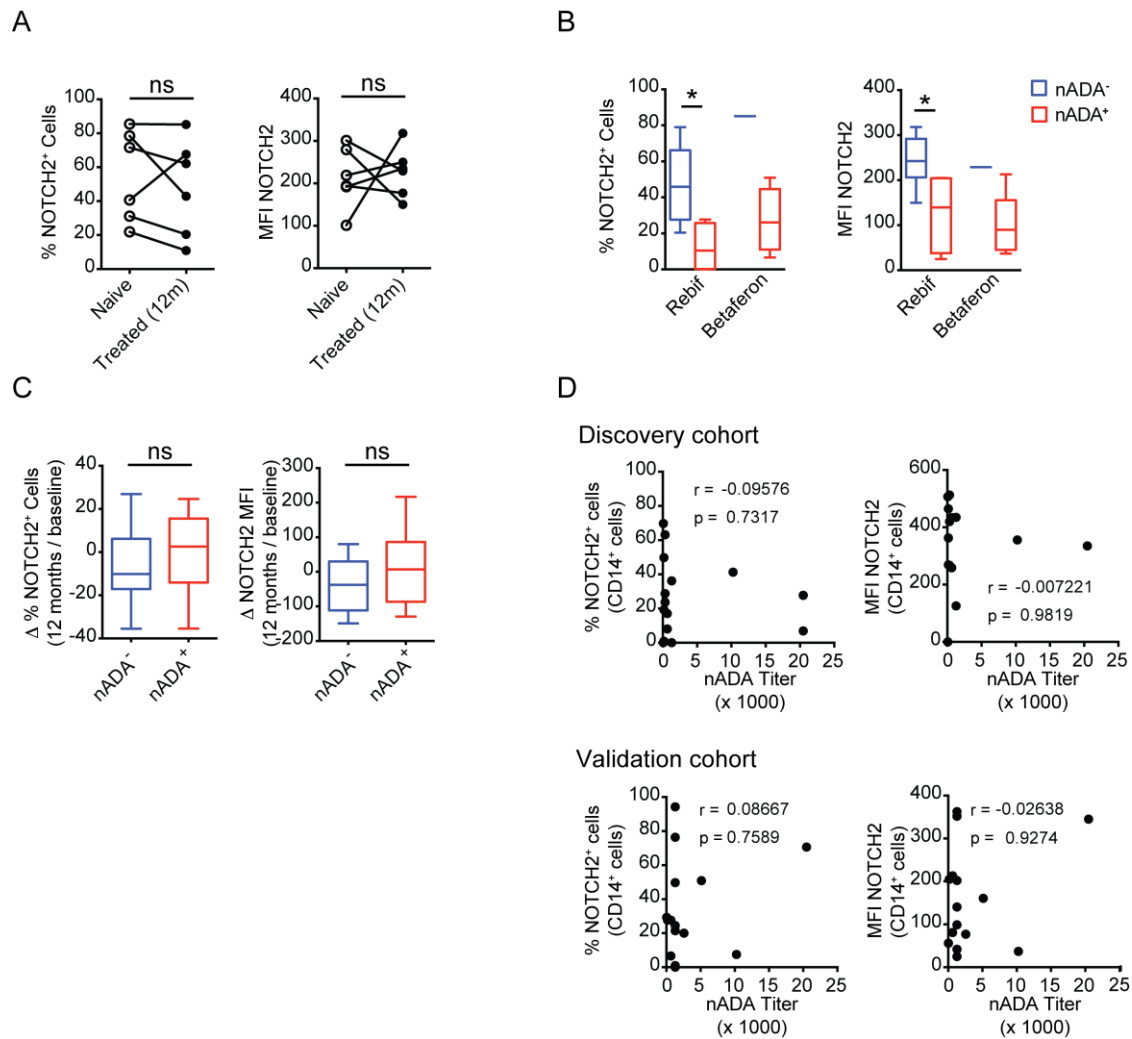

**Supplemental Figure 4. Effect of IFN-β treatment, drug preparations and ADA titre on NOTCH2 expression.**

**A)** NOTCH2 monocyte membrane expression was evaluated in 6 MS patients before (open circles) and after IFN-β treatment (full circles). Paired T test; ns = not significant. **(B)** To evaluate the effect of different IFN-β preparations on NOTCH2 expression, patients were stratified accordingly the type of IFN-β taken (mammalian derived Rebif: nADA<sup>+</sup>n=5, nADA<sup>-</sup> n=8; E.coli derived Betaferon: nADA<sup>+</sup>n=8, nADA<sup>-</sup> n=1). One patient (nADA<sup>-</sup>) was treated with Avonex (mammalian derived) in our cohorts and could not be included in the figure. The same trend for NOTCH2 expression was observed in the 2 groups analysed. The box plot shows the median and 25th and 75th percentiles, and the whiskers represent minimum and maximum values. Mann Whitney test \*P<0.05. **(C)** The presence of nADA did not induce changes in NOTCH2 expression. There was no difference between nADA<sup>+</sup> and nADA<sup>-</sup> patients in the delta NOTCH2 percentage positive monocytes (p=0.5282) nor in the delta NOTCH2 MFI (p=0.315). The box plot shows the median and 25th and 75th

percentiles, and the whiskers represent minimum and maximum values. Mann Whitney test.

**(D)** The titre of nADA in all analysed patients was correlated with the expression of NOTCH2. Spearman's correlation coefficient (r) and P value (p) are reported in figure.

## Supplemental Figure 5

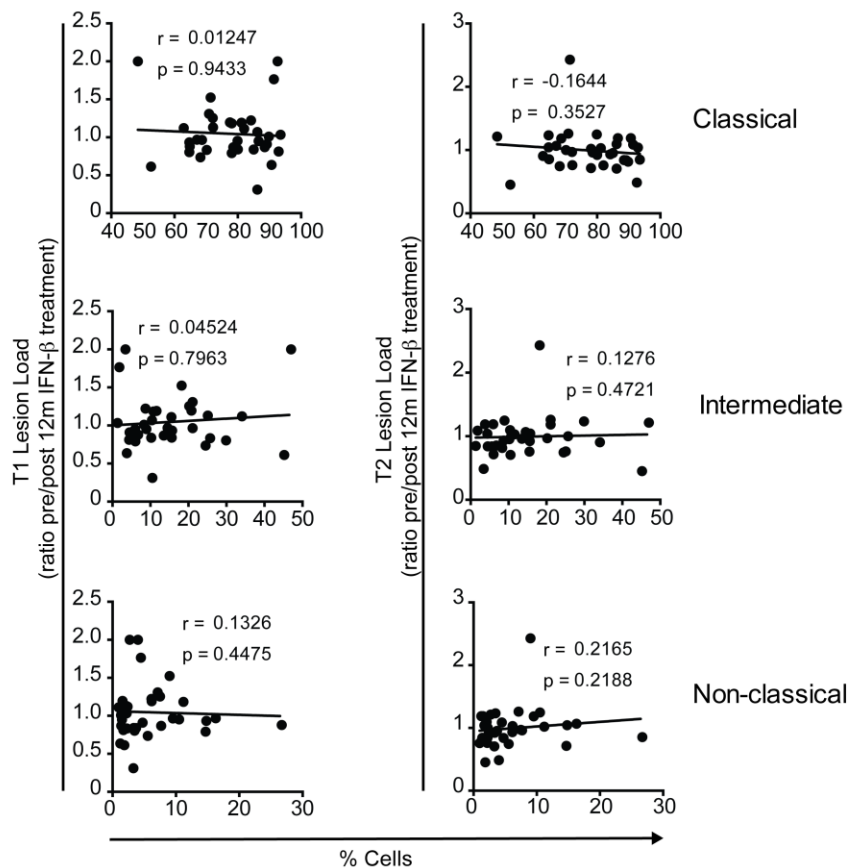

### Supplemental Figure 5. Monocyte subsets correlation with disease progression.

The frequency of classical ( $CD14^+CD16^-$ ), intermediate ( $CD14^+CD16^+$ ) and non-classical ( $CD14^{low}CD16^+$ ) monocyte subsets was correlated with disease progression assessed by MRI measurements T1 and T2. Changes in brain lesions detected by comparing MRI scanning at the time of PBMC isolation to MRI scans performed 12 months before sampling.  $n=34$ . Spearman's correlation coefficient ( $r$ ) and the associated P value ( $p$ ) are reported in figure.

## Supplemental Figure 6

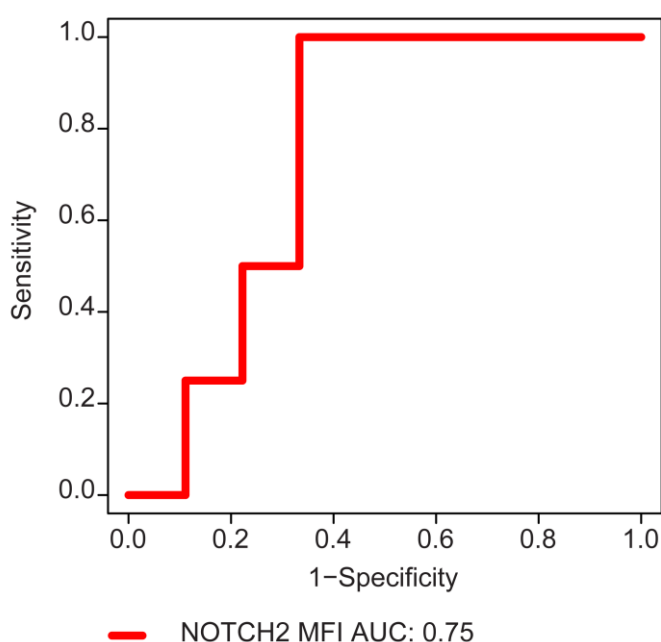

### Supplemental Figure 6. ROC Analysis of MS baseline samples screened with LegendScreen

We repeated the ROC curve analyses using the patients of the prospective cohort whose baseline samples had been run on a miniplate of selected markers to build the predictor (a logistic regression model) and applying the predictor on another subset of patients from the prospective cohort whose baseline samples had been run with the complete Legendscreen panel of 332 markers (patients description in Table 1 Discovery cohort). We obtained a good discriminatory ability of nADA status (AUC=0.75) with the predictor using NOTCH2 MFI, in spite of different fluorescence levels of the subsets of patients due to the different technologies used

## Supplemental Figure 7

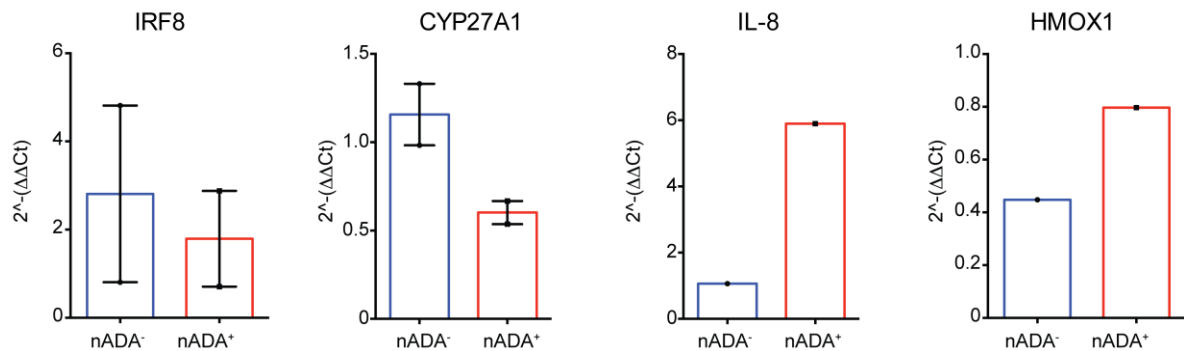

### Supplemental Figure 7. Markers associated with non-classical monocyte differentiation after culture with nADA<sup>+</sup> or nADA<sup>-</sup> patient serum.

Healthy donor PBMCs were cultured with nADA<sup>-</sup> or nADA<sup>+</sup> patient serum. CD14<sup>+</sup> monocytes were isolated and the expression of markers previously reported to be differently expressed in monocyte subsets was assessed. IRF8 and CYP27A1 were previously reported to be most highly expressed in classical monocytes (2, 3); IL8 and HMOX1 are highly expressed in non-classical monocytes (2, 4).

### References

1. Hermanrud C et al. Development and validation of cell-based luciferase reporter gene assays for measuring neutralizing anti-drug antibodies against interferon beta. *J. Immunol. Methods* 2016;430:1–9
2. Gren ST et al. A Single-Cell Gene-Expression Profile Reveals Inter-Cellular Heterogeneity within Human Monocyte Subsets. *PLoS One* 2015;10(12):e0144351.
3. Wong KL et al. Gene expression profiling reveals the defining features of the classical, intermediate, and nonclassical human monocyte subsets. *Blood* 2011;118(5):e16–e31.
4. Thaler B et al. Differential in vivo activation of monocyte subsets during low-grade inflammation through experimental endotoxemia in humans. *Sci. Rep.* 2016;6(1):30162.
